# Supplementary material for: “Non-invasive” portable laser ablation sampling for lead isotope analysis of archaeological silver: a comparison with bulk and in situ laser ablation techniques
Source: Royal Society of Chemistry journal article supplement (doi:10.1039/d1ja00342a), 2021-12-01
Supplement: d1ja00342a1.xlsx [file d1ja00342a1.xlsx]

## Sheet: Table S1 VU filter MC-ICPMS
Table S1. VU filter MC-ICPMS data
	206Pb/204Pb	2SE	207Pb/204Pb	2SE	208Pb/204Pb	2SE	207Pb/206Pb	2SE	208Pb/206Pb	2SE	Ag/Pb
RMAg981-3	16.965	0.002	15.494	0.002	36.729	0.004	0.9133	2e-05	2.165	4e-05	11.5	Outlier, rejected
	16.938	0.002	15.491	0.002	36.7	0.004	0.91457	1e-05	2.16675	4e-05	2.1
	16.942	0.002	15.496	0.002	36.715	0.004	0.91463	2e-05	2.1671	5e-05	2.8
	16.938	0.002	15.49	0.002	36.697	0.004	0.91449	2e-05	2.16652	6e-05	5.6
	16.939	0.002	15.492	0.002	36.704	0.004	0.91459	2e-05	2.16683	4e-05	27.7
	16.936	0.002	15.49	0.002	36.697	0.004	0.91461	2e-05	2.16673	4e-05	21.7
	16.935	0.001	15.488	0.001	36.69	0.003	0.91454	2e-05	2.16646	5e-05	1.6
	16.936	0.001	15.49	0.001	36.695	0.003	0.91458	1e-05	2.16665	4e-05	2.9
	16.937	0.002	15.491	0.002	36.699	0.005	0.91463	2e-05	2.16683	4e-05	9.1
	16.939	0.002	15.494	0.002	36.709	0.005	0.91467	2e-05	2.16706	4e-05	10.9
MBH-AGA3	17.406	0.001	15.54	0.001	37.258	0.003	0.89283	1e-05	2.14057	3e-05	16.5
	17.408	0.001	15.547	0.001	37.276	0.003	0.89308	1e-05	2.14131	4e-05	10.5
	17.408	0.001	15.547	0.001	37.276	0.003	0.89308	1e-05	2.14129	5e-05	1
	17.413	0.001	15.553	0.001	37.296	0.003	0.89318	1e-05	2.14179	3e-05	6.8
	17.412	0.001	15.551	0.001	37.291	0.002	0.89316	1e-05	2.1417	3e-05	17.1
	17.412	0.001	15.551	0.001	37.291	0.003	0.89314	1e-05	2.14166	5e-05	4.1
	17.412	0.001	15.552	0.001	37.291	0.002	0.89317	1e-05	2.1417	3e-05	10.4
	17.407	0.001	15.545	0.001	37.271	0.003	0.89305	1e-05	2.14115	3e-05	5.2
	17.405	0.001	15.542	0.001	37.261	0.003	0.89297	1e-05	2.14084	3e-05	9.6
RMAgD-1	18.687	0.002	15.657	0.002	38.785	0.004	0.83783	1e-05	2.07541	3e-05	2.1
	18.684	0.002	15.652	0.002	38.771	0.004	0.83776	2e-05	2.07508	4e-05	8.2
	18.688	0.002	15.658	0.002	38.787	0.004	0.83788	1e-05	2.07551	3e-05	8.3
	18.687	0.002	15.656	0.002	38.782	0.004	0.8378	1e-05	2.07528	3e-05	3.1
	18.692	0.001	15.663	0.001	38.804	0.003	0.83791	1e-05	2.07587	3e-05	42.8
	18.692	0.001	15.661	0.001	38.799	0.003	0.83788	1e-05	2.07571	3e-05	6.4
	18.687	0.002	15.657	0.002	38.783	0.005	0.83786	1e-05	2.07542	4e-05	36.4
	18.689	0.002	15.659	0.002	38.793	0.004	0.83787	1e-05	2.07564	3e-05	19.5
	18.692	0.002	15.653	0.002	38.772	0.005	0.83742	1e-05	2.07422	4e-05	4.1	Outlier, rejected
RMAgN-2	18.51	0.001	15.641	0.001	38.648	0.003	0.84502	1e-05	2.08794	3e-05	1
	18.511	0.001	15.643	0.001	38.654	0.003	0.84507	1e-05	2.08813	4e-05	3.3
	18.513	0.001	15.645	0.001	38.661	0.003	0.84508	1e-05	2.08826	5e-05	9
	18.511	0.001	15.643	0.001	38.653	0.003	0.84507	2e-05	2.0881	4e-05	4.9
	18.513	0.001	15.645	0.001	38.661	0.003	0.8451	1e-05	2.08829	4e-05	3.4
	18.507	0.001	15.638	0.001	38.638	0.003	0.84499	1e-05	2.08774	3e-05	8.1
	18.509	0.001	15.64	0.001	38.642	0.003	0.845	1e-05	2.08778	3e-05	0.4
	18.508	0.001	15.64	0.001	38.645	0.003	0.84502	1e-05	2.08795	3e-05	6.4
	18.498	0.001	15.64	0.001	38.619	0.003	0.84551	2e-05	2.08778	3e-05	2.9	Outlier, rejected
RMAgS-1	18.049	0.001	15.584	0.001	38.102	0.003	0.86341	1e-05	2.111	3e-05	1.5
	18.049	0.001	15.583	0.001	38.1	0.003	0.86336	1e-05	2.11083	3e-05	2.7
	18.045	0.001	15.578	0.001	38.084	0.002	0.86328	1e-05	2.11047	3e-05	2.1
	18.048	0.001	15.582	0.001	38.095	0.003	0.86335	1e-05	2.11077	4e-05	9
	18.055	0.001	15.591	0.001	38.125	0.002	0.86349	1e-05	2.11151	3e-05	3.7
	18.056	0.001	15.59	0.001	38.122	0.003	0.86343	1e-05	2.11125	3e-05	14.4
	18.054	0.001	15.588	0.001	38.118	0.003	0.86345	1e-05	2.11134	3e-05	10.6
	18.047	0.001	15.581	0.001	38.092	0.003	0.86333	1e-05	2.11065	3e-05	8
	18.048	0.001	15.582	0.001	38.098	0.003	0.86338	1e-05	2.1109	3e-05	7.3
	18.056	0.001	15.592	0.001	38.127	0.003	0.86351	1e-05	2.11154	4e-05	2.7
RMAgC-1	18.534	0.001	15.644	0.001	38.494	0.003	0.84405	1e-05	2.07689	4e-05	3
	18.536	0.001	15.646	0.001	38.502	0.003	0.8441	1e-05	2.07711	3e-05	8.2
	18.535	0.001	15.644	0.001	38.496	0.003	0.84407	1e-05	2.07696	3e-05	4
	18.53	0.001	15.638	0.001	38.476	0.003	0.84398	1e-05	2.07647	3e-05	40.9
	18.525	0.002	15.634	0.002	38.462	0.004	0.84394	1e-05	2.07617	5e-05	11.1
	18.525	0.001	15.632	0.001	38.455	0.003	0.84385	1e-05	2.07583	3e-05	15.9
	18.535	0.001	15.645	0.001	38.497	0.003	0.84405	1e-05	2.07696	3e-05	15.7
	18.53	0.001	15.636	0.001	38.471	0.003	0.84387	1e-05	2.07617	3e-05	5.4
	18.534	0.001	15.644	0.001	38.494	0.003	0.84406	1e-05	2.07689	3e-05	8
	18.524	0.001	15.631	0.001	38.452	0.003	0.84383	1e-05	2.07577	3e-05	15.2
RMAgP-2	20.074	0.003	15.823	0.002	40.98	0.005	0.78822	1e-05	2.04142	3e-05	1.6
	20.074	0.002	15.822	0.002	40.978	0.005	0.78822	1e-05	2.04137	4e-05	3.1
	20.076	0.002	15.823	0.002	40.982	0.005	0.7882	1e-05	2.04137	3e-05	2.3
	20.077	0.002	15.826	0.002	40.99	0.005	0.78826	1e-05	2.04164	3e-05	5.3
	20.077	0.001	15.826	0.001	40.991	0.003	0.78825	1e-05	2.04165	3e-05	5.7
	20.073	0.003	15.822	0.002	40.975	0.006	0.78822	1e-05	2.04127	4e-05	2.2
	20.076	0.003	15.825	0.002	40.986	0.005	0.78823	1e-05	2.04145	4e-05	4.4
	20.075	0.003	15.823	0.002	40.98	0.005	0.78819	1e-05	2.04134	4e-05	4.7
	20.075	0.003	15.823	0.002	40.979	0.006	0.78817	1e-05	2.04123	4e-05	3.6
	20.072	0.002	15.822	0.002	40.975	0.005	0.78824	2e-05	2.04137	4e-05	18.8
RMAg3834	18.447	0.001	15.637	0.001	38.466	0.003	0.84767	1e-05	2.08517	3e-05	0.6
	18.45	0.001	15.64	0.001	38.474	0.002	0.84769	1e-05	2.08534	3e-05	3.2
	18.449	0.001	15.642	0.001	38.479	0.003	0.84788	1e-05	2.08573	4e-05	2.6
	18.443	0.002	15.641	0.002	38.472	0.005	0.84804	1e-05	2.08593	5e-05	1.7
	18.451	0.001	15.641	0.001	38.48	0.003	0.84772	1e-05	2.08548	3e-05	2.6
	18.451	0.001	15.642	0.001	38.484	0.002	0.84777	1e-05	2.0857	3e-05	5
	18.449	0.001	15.639	0.001	38.473	0.003	0.84772	1e-05	2.08536	3e-05	0.7
	18.447	0.002	15.639	0.002	38.47	0.005	0.84776	1e-05	2.08541	4e-05	2.1
	18.447	0.002	15.639	0.002	38.471	0.005	0.84776	1e-05	2.08547	4e-05	4.1
	18.449	0.002	15.639	0.002	38.472	0.004	0.84771	2e-05	2.08531	4e-05	3.7
RMAg12467	18.534	0.001	15.663	0.001	38.652	0.003	0.8451	1e-05	2.08548	4e-05	1.2
	18.529	0.001	15.66	0.001	38.642	0.003	0.84517	1e-05	2.08544	4e-05	1
	18.531	0.001	15.658	0.001	38.636	0.003	0.845	1e-05	2.08498	3e-05	1.3
	18.535	0.001	15.664	0.001	38.655	0.003	0.84511	1e-05	2.08552	4e-05	5.6
	18.531	0.001	15.66	0.001	38.64	0.003	0.84508	1e-05	2.0852	3e-05	1.3
	18.533	0.002	15.662	0.002	38.649	0.004	0.8451	1e-05	2.08537	3e-05	1.5
	18.534	0.001	15.664	0.001	38.656	0.003	0.84517	1e-05	2.08564	3e-05	2.3
	18.532	0.001	15.66	0.001	38.643	0.003	0.84505	1e-05	2.08523	3e-05	1.1
	18.542	0.001	15.672	0.001	38.682	0.003	0.84525	1e-05	2.08621	3e-05	6.2	Outlier, rejected

## Sheet: Table S2 Oxford MC-ICPMS
Table S2. Oxford MC-ICPMS bulk analyses
	206Pb/204Pb	2SE	207Pb/204Pb	2SE	208Pb/204Pb	2SE	207Pb/206Pb	2SE	208Pb/206Pb	2SE
RMAG981-1	16.9444	0.00261694	15.493	0.000887294	36.7108	0.00229402	0.914343	0.00010287	2.16654	0.000262517	Oxford, sol. Sept. 2019
	16.9445	0.00272575	15.4927	0.00116951	36.7105	0.00288473	0.91432	0.000130138	2.16651	0.000313694	Oxford, sol. Sept. 2019
	16.9459	0.00396595	15.4947	0.000828338	36.7167	0.00244344	0.91436	0.000190689	2.1667	0.000431302	Oxford, sol. Sept. 2019
RMAg981-3	16.9346	0.00113842	15.484	0.00124946	36.685	0.00331274	0.914345	2.2316e-05	2.16628	7.61202e-05	Oxford, sol., Nov. 2019
	16.9358	0.0010966	15.4858	0.000965189	36.6905	0.0027943	0.914379	1.78438e-05	2.16644	6.38216e-05	Oxford, sol., Nov. 2019
	16.934	0.000884781	15.484	0.00103341	36.6857	0.00296788	0.914374	2.11532e-05	2.16639	8.10517e-05	Oxford, sol., Nov. 2019
	16.9387	0.000919055	15.4909	0.000879405	36.7071	0.00223588	0.914526	1.21558e-05	2.16706	4.45246e-05	Oxford, Sol. Dec. 2019
	16.937	0.000667918	15.4891	0.000670561	36.7019	0.00191183	0.914514	1.90334e-05	2.16697	6.33514e-05	Oxford, Sol. Dec. 2019
	16.9385	0.00107292	15.4904	0.00107186	36.7046	0.00265513	0.914507	1.63809e-05	2.16693	4.5419e-05	Oxford, Sol. Dec. 2019
MBH-AGA3	17.4094	0.000817229	15.5453	0.000839742	37.2786	0.00196611	0.892923	3.53953e-05	2.14129	9.15196e-05	Oxford, sol. Sept. 2019
	17.4084	0.00110926	15.5447	0.00100393	37.277	0.00240901	0.892945	1.9061e-05	2.14132	6.06556e-05	Oxford, sol. Sept. 2019
	17.4094	0.00116712	15.5461	0.0010638	37.2805	0.00308388	0.892969	2.75885e-05	2.1414	9.18062e-05	Oxford, sol. Sept. 2019
	17.4122	0.00114391	15.5501	0.00122025	37.2949	0.00337845	0.89306	2.12874e-05	2.14189	7.45451e-05	Oxford, sol., Nov. 2019
	17.4106	0.000902227	15.5482	0.000903756	37.2887	0.0026634	0.893033	1.9901e-05	2.14173	7.68952e-05	Oxford, sol., Nov. 2019
	17.4106	0.000819644	15.5481	0.000693955	37.2872	0.00213157	0.893024	1.4132e-05	2.14164	6.78097e-05	Oxford, sol., Nov. 2019
RMAgD-1	18.6946	0.001232	15.655	0.00110194	38.7812	0.00287651	0.837407	1.12215e-05	2.07445	5.00638e-05	Oxford, sol. Sept. 2019
	18.6911	0.00115562	15.6531	0.00111644	38.7769	0.00297993	0.83746	1.50369e-05	2.07461	5.0142e-05	Oxford, sol. Sept. 2019
	18.6931	0.00100919	15.6558	0.000935535	38.7848	0.00281546	0.837516	1.86872e-05	2.07481	7.63657e-05	Oxford, sol. Sept. 2019
	18.6881	0.000937141	15.6526	0.000905791	38.7785	0.00247875	0.837568	1.73032e-05	2.07503	6.10268e-05	Oxford, sol. Sept. 2019
	18.6865	0.000882424	15.6529	0.000854616	38.7802	0.00261418	0.837654	2.35085e-05	2.0753	7.03114e-05	Oxford, sol. Sept. 2019
	18.6852	0.00103144	15.6521	0.000912316	38.7788	0.00257507	0.83767	1.60661e-05	2.07537	6.23724e-05	Oxford, sol. Sept. 2019
	18.6924	0.00123486	15.6529	0.0011548	38.7747	0.00257665	0.837394	1.8303e-05	2.07435	6.61581e-05	Oxford, sol. Sept. 2019
	18.691	0.00128008	15.6531	0.00108829	38.7761	0.00253395	0.837467	1.69129e-05	2.07458	5.16339e-05	Oxford, sol. Sept. 2019
	18.6901	0.00117004	15.6529	0.00105982	38.7763	0.00288384	0.837496	1.49671e-05	2.07469	5.22149e-05	Oxford, sol. Sept. 2019
	18.6898	0.00106083	15.6537	0.000933348	38.78	0.00248044	0.837549	1.1067e-05	2.07492	5.33879e-05	Oxford, sol. Sept. 2019
	18.688	0.00112287	15.6527	0.00103202	38.7777	0.00267872	0.837577	1.12405e-05	2.075	3.86465e-05	Oxford, sol. Sept. 2019
	18.6869	0.000855479	15.6525	0.000755813	38.7779	0.00201716	0.837616	1.81319e-05	2.07513	5.13437e-05	Oxford, sol. Sept. 2019
	18.6867	0.000779297	15.652	0.000734848	38.7768	0.00209109	0.837599	1.22179e-05	2.0751	4.86984e-05	Oxford, Sol. Dec. 2019
	18.6852	0.000787691	15.65	0.000796027	38.7709	0.00216542	0.837563	1.58416e-05	2.07495	4.83067e-05	Oxford, Sol. Dec. 2019
	18.6857	0.00116098	15.6507	0.00110356	38.7716	0.00250169	0.837575	1.21072e-05	2.07494	3.06464e-05	Oxford, Sol. Dec. 2019
RMAgN-2	18.51	0.00130067	15.64	0.00112712	38.6496	0.00291588	0.844948	1.58588e-05	2.08804	5.54786e-05	Oxford, sol. Sept. 2019
	18.5096	0.000785562	15.6407	0.000747459	38.6517	0.00227599	0.845004	1.53266e-05	2.0882	6.60083e-05	Oxford, sol. Sept. 2019
	18.5074	0.00125697	15.6386	0.00106808	38.6464	0.00291992	0.844989	1.50413e-05	2.08816	4.57508e-05	Oxford, sol. Sept. 2019
	18.5184	0.000902553	15.6385	0.000790642	38.654	0.00224239	0.844483	1.31754e-05	2.08733	4.74596e-05	Oxford, sol. Sept. 2019
	18.518	0.000621877	15.6393	0.000555971	38.6574	0.00139744	0.844548	1.09783e-05	2.08756	4.49821e-05	Oxford, sol. Sept. 2019
	18.5176	0.00127336	15.6397	0.00117659	38.6588	0.00324356	0.844586	1.7303e-05	2.08768	7.90696e-05	Oxford, sol. Sept. 2019
	18.5011	0.00111223	15.6282	0.0011054	38.6135	0.00297219	0.844719	1.54289e-05	2.0871	6.09212e-05	Oxford, sol., Nov. 2019
	18.5033	0.00105512	15.6306	0.0010651	38.6213	0.00261989	0.844749	1.76202e-05	2.08727	5.70193e-05	Oxford, sol., Nov. 2019
	18.5018	0.00127597	15.6288	0.00101253	38.6137	0.00286591	0.844717	1.4758e-05	2.08702	6.2406e-05	Oxford, sol., Nov. 2019
	18.5113	0.000838127	15.6407	0.000681187	38.6542	0.00159471	0.844927	1.66423e-05	2.08814	4.47099e-05	Oxford, Sol. Dec. 2019
	18.5111	0.000913566	15.6404	0.000750506	38.653	0.00230242	0.844922	1.30751e-05	2.0881	4.49154e-05	Oxford, Sol. Dec. 2019
	18.5101	0.00104487	15.6392	0.000849397	38.6501	0.00224155	0.844898	1.61973e-05	2.08805	4.211e-05	Oxford, Sol. Dec. 2019
RMAgS-1	18.0605	0.00782753	15.5817	0.00185925	38.097	0.00260076	0.862751	0.000301326	2.10941	0.000907743	Oxford, sol. Sept. 2019
	18.0508	0.00108463	15.5824	0.000812399	38.1034	0.00225588	0.863254	2.49798e-05	2.1109	9.64404e-05	Oxford, sol. Sept. 2019
	18.0502	0.00124424	15.583	0.000920893	38.1056	0.00250824	0.863311	2.56732e-05	2.11109	0.000105931	Oxford, sol. Sept. 2019
	18.0454	0.00123108	15.5754	0.00128257	38.0817	0.0035819	0.863123	1.97668e-05	2.11033	7.25448e-05	Oxford, sol., Nov. 2019
	18.0459	0.000849138	15.5761	0.000841781	38.0829	0.00248765	0.863136	1.60997e-05	2.11033	6.59989e-05	Oxford, sol., Nov. 2019
	18.0405	0.000807842	15.5708	0.000677327	38.0682	0.00203112	0.863102	1.76649e-05	2.11016	6.47999e-05	Oxford, sol., Nov. 2019
	18.05	0.000863608	15.5808	0.000964863	38.0987	0.00268747	0.863198	1.19776e-05	2.11073	5.23276e-05	Oxford, Sol. Dec. 2019
	18.0476	0.0010696	15.5791	0.000998355	38.0951	0.0025333	0.863218	1.58137e-05	2.11081	5.23969e-05	Oxford, Sol. Dec. 2019
	18.0453	0.00120558	15.5767	0.00113374	38.0893	0.00270806	0.8632	1.4527e-05	2.11076	4.24666e-05	Oxford, Sol. Dec. 2019
RMAgC-1	18.5293	0.000953656	15.6349	0.000874285	38.473	0.00231078	0.843794	1.12274e-05	2.07633	3.3138e-05	Oxford, Sol. Mar. 2021
	18.5254	0.000900465	15.6315	0.000809041	38.4644	0.00223975	0.843787	1.20241e-05	2.07631	4.1696e-05	Oxford, Sol. Mar. 2021
	18.525	0.00108168	15.6307	0.000925772	38.4607	0.00269187	0.843763	1.48083e-05	2.07615	5.76798e-05	Oxford, Sol. Mar. 2021
RMAgP-2	20.0781	0.000857814	15.8209	0.00081972	40.9864	0.00220151	0.787966	1.09782e-05	2.04135	4.16706e-05	Oxford, Sol. Mar. 2021
	20.0744	0.000927713	15.8183	0.000835001	40.9789	0.00249915	0.787983	1.3038e-05	2.04135	4.13116e-05	Oxford, Sol. Mar. 2021
	20.0791	0.00112743	15.8214	0.000843449	40.986	0.00249386	0.787957	1.18383e-05	2.04123	4.52665e-05	Oxford, Sol. Mar. 2021
	20.0652	0.00154011	15.8075	0.00123559	40.936	0.00353173	0.787804	1.8561e-05	2.04015	5.13625e-05	Oxford, Sol. Mar. 2020
	20.063	0.000705059	15.8054	0.00071505	40.9305	0.00211352	0.787791	1.48449e-05	2.0401	4.7969e-05	Oxford, Sol. Mar. 2020
	20.0639	0.00120667	15.8068	0.000856535	40.9335	0.00198831	0.787824	1.80973e-05	2.04015	4.81184e-05	Oxford, Sol. Mar. 2020
RMAg3834	18.4461	0.000836441	15.633	0.000875644	38.4626	0.00225767	0.847497	1.3547e-05	2.08513	5.95796e-05	Oxford, Sol. Dec. 2019
	18.4471	0.00100017	15.6337	0.00096032	38.4637	0.00259919	0.847489	1.13778e-05	2.08508	5.30793e-05	Oxford, Sol. Dec. 2019
	18.4488	0.000925463	15.6351	0.000964224	38.4671	0.00259142	0.847487	1.04917e-05	2.08508	4.5212e-05	Oxford, Sol. Dec. 2019
	18.4465	0.0005669	15.6324	0.000436697	38.4601	0.00122428	0.847446	1.25846e-05	2.08496	3.82704e-05	Oxford, Sol. Mar. 2021
	18.4478	0.00111524	15.6341	0.000927771	38.4642	0.00259173	0.847478	1.26273e-05	2.08503	4.14118e-05	Oxford, Sol. Mar. 2021
	18.4469	0.00111944	15.6326	0.00105085	38.4594	0.00290719	0.847434	1.47893e-05	2.08487	5.65256e-05	Oxford, Sol. Mar. 2021
RMAg12467	18.532	0.000687408	15.6578	0.00082315	38.6438	0.00213033	0.844908	1.57263e-05	2.08524	4.82333e-05	Oxford, Sol. Dec. 2019
	18.5311	0.00119057	15.6566	0.00109538	38.6407	0.00299245	0.84488	1.35689e-05	2.08517	5.53972e-05	Oxford, Sol. Dec. 2019
	18.5322	0.00105251	15.6579	0.000897303	38.6433	0.00217366	0.844899	1.30745e-05	2.08519	4.18007e-05	Oxford, Sol. Dec. 2019
	18.5333	0.00101575	15.659	0.000945579	38.6472	0.00258228	0.844912	9.95412e-06	2.08528	4.8448e-05	Oxford, Sol. Mar. 2021
	18.5338	0.000951699	15.6596	0.00107442	38.6474	0.00206773	0.844925	1.27052e-05	2.08524	4.63904e-05	Oxford, Sol. Mar. 2021
	18.531	0.000889821	15.6573	0.000889374	38.6427	0.00209382	0.844926	1.3659e-05	2.0853	3.38139e-05	Oxford, Sol. Mar. 2021

## Sheet: Table S3 Summary nsLA-MC-ICPMS
Table S3. Summary of nsLA-MC-ICPMS analyses (means).
Ref. Material	206Pb/204Pb	2SE	207Pb/204Pb	2SE	208Pb/204Pb	2SE	207Pb/206Pb	2SE	208Pb/206Pb	2SE	(n)
RMAg981-3	16.9677	0.0239576	15.5165	0.0229272	36.7622	0.0600837	0.914492	0.000335895	2.1665	0.00201244	26	Interlab. Average
RMAg981-1	16.976	0.041	15.5248	0.039	36.7789	0.12	0.914484	0.0006	2.16632	0.0043	17	Southam. ns-LA April 2019
RMAg981-3	16.9382	0.00753259	15.4912	0.0157219	36.7114	0.0641164	0.914574	0.000983919	2.16738	0.00402107	6	Vega, ns-LA Sept. 2019
RMAg981-3	16.9794	0.0421902	15.5201	0.0551194	36.7688	0.114254	0.914376	0.000332008	2.16579	0.0011361	3	UoE, ns-LA, Nov. 2019
MBH-AGA 3	17.4114	0.0161768	15.5478	0.0147238	37.2825	0.0431656	0.892955	0.000118797	2.14134	0.00163302	11	Interlab. Average
MBH-AGA 3	17.411	0.0149578	15.5488	0.0133338	37.2923	0.0239919	0.892989	5.01607e-05	2.14181	0.00022178	8	Southam. ns-LA April 2019
MBH-AGA-3	17.4122	0.0189404	15.545	0.0166725	37.2562	0.0387964	0.892865	2.11418e-05	2.14007	0.000919635	3	UoE, ns-LA, Nov. 2019
RMAgD-1	18.7036	0.0164539	15.6695	0.0225305	38.8254	0.078909	0.837794	0.000719533	2.07592	0.00314184	15	Interlab. Average
RMAgD-1	18.7105	0.00628458	15.6724	0.0030919	38.8308	0.00851549	0.837622	5.15466e-05	2.07564	0.000277837	3	Southam. ns-LA April 2019
RMAgD-1	18.7012	0.018685	15.6685	0.0287027	38.8316	0.0967832	0.837835	0.000897039	2.07643	0.00363965	9	Vega, ns-LA, Sept. 2019
RMAgD-1	18.7039	0.002	15.6699	0.004	38.8013	0.008	0.8378	0.0002	2.0747	0.0003	3	UoE, ns-LA, Nov. 2019
RMAgN-2	18.5064	0.0188795	15.6357	0.015931	38.625	0.0444714	0.844904	0.000446511	2.08729	0.00163469	23	Interlab. Average
RMAgN-2	18.5064	0.0228892	15.6369	0.0186354	38.6188	0.044269	0.844983	0.000213096	2.08705	0.000515955	15	UoE, ns-LA, Nov. 2019
RMAgN-2	18.5064	0.00651249	15.6335	0.00693072	38.6368	0.0341206	0.844757	0.00059629	2.08775	0.00243151	8	Vega, ns-LA Sept. 2019
RMAgS-1	18.0531	0.0256861	15.5829	0.022587	38.0902	0.0676019	0.863255	0.000250148	2.11019	0.0011544	16	Interlab. Average
RMAgS-1	18.0503	0.0251726	15.581	0.0232954	38.082	0.0641503	0.863268	0.000262467	2.10999	0.000849969	13	UoE, ns-LA, Nov. 2019
RMAgS-1	18.0648	0.00955103	15.5911	0.00642211	38.1256	0.0190747	0.863194	0.000131964	2.11104	0.000606019	3	Southam. ns-LA April 2019
RMAgC-1	18.5315	0.0525935	15.6462	0.0458862	38.4666	0.118654	0.844394	8.19249e-05	2.07625	0.00062953	3	Southam. ns-LA April 2019
RMAgP-1	20.1081	0.0251216	15.8317	0.0247369	41.0173	0.0689425	0.787396	0.000110139	2.04026	0.000506314	3	Southam. ns-LA April 2019
RMAg3834	18.4599	0.022395	15.6531	0.0395829	38.523	0.121524	0.847947	0.00130507	2.08684	0.00437806	8	Vega, ns-LA Sept. 2019
RMAg12467	18.5382	0.0619169	15.6666	0.051332	38.6654	0.148342	0.845076	0.00108855	2.08572	0.00374121	50	Interlab. Average
RMAg12467	18.5365	0.035671	15.6619	0.0295163	38.6563	0.0764909	0.844864	0.000242027	2.08539	0.00161593	30	Southam. ns-LA April 2019
RMAg12467	18.546	0.026527	15.6788	0.0515423	38.7185	0.178717	0.8454	0.00158123	2.0877	0.00669134	9	Vega, ns-LA Sept. 2019
RMAg12467	18.5363	0.114614	15.6696	0.0816177	38.6467	0.21539	0.845392	0.00139502	2.08499	0.00193249	11	UoE, ns-LA, Nov. 2019

## Sheet: Table S4 Southampton nsLA
Table S4. Southampton nsLA-MC-ICPMS analyses.
	206Pb/204Pb	2SE	207Pb/204Pb	2SE	208Pb/204Pb	2SE	207Pb/206Pb	2SE	208Pb/206Pb	2SE
RMAg981-1	16.969	0.0223378	15.5226	0.0244077	36.7519	0.0900637	0.914718	0.000280661	2.16593	0.000244065
	16.9474	0.0206347	15.4958	0.018532	36.6695	0.0892409	0.9143	2.33771e-05	2.16383	7.5797e-05
	16.9542	0.0341813	15.5109	0.0313913	36.7623	0.14596	0.914829	2.31138e-05	2.16843	0.0001266
	16.9382	0.0370635	15.4922	0.0338879	36.7007	0.156294	0.914593	2.12665e-05	2.16565	0.00244732
	16.9759	0.04019	15.5255	0.036857	36.771	0.176661	0.914132	9.71821e-05	2.16177	0.00268044
	16.9588	0.0393758	15.5053	0.035738	36.7092	0.165429	0.914263	5.09829e-05	2.16459	0.000497023
	16.9853	0.0400589	15.5394	0.0360874	36.8533	0.17363	0.914822	4.48208e-05	2.16982	7.64433e-05
	16.9762	0.0489678	15.5114	0.0439891	36.7976	0.212213	0.913668	5.57136e-05	2.16771	5.37586e-05
	16.9733	0.0401908	15.5255	0.0364787	36.7906	0.176082	0.914656	9.7325e-05	2.16766	0.000442937
	17.0076	0.0442336	15.5576	0.0402343	36.8705	0.195879	0.914694	0.000101373	2.16799	0.00051048
	17.0099	0.0448027	15.5555	0.0403911	36.8546	0.193278	0.91445	6.31556e-05	2.16676	0.000279405
	16.9903	0.038729	15.5392	0.0351486	36.818	0.170871	0.914545	8.74733e-05	2.16723	0.000365269
	16.9918	0.05474	15.5364	0.050369	36.8031	0.245319	0.914299	8.14502e-05	2.16604	0.000408422
	16.9825	0.0527718	15.5273	0.0473279	36.7929	0.228213	0.914619	7.0015e-05	2.16731	0.000236699
	17.0012	0.0296794	15.5478	0.0264806	36.8424	0.127298	0.914588	3.7263e-05	2.16738	0.000126217
	16.9618	0.0463937	15.5127	0.0418304	36.7558	0.201039	0.914503	3.9561e-05	2.16706	8.20314e-05
	16.9681	0.0537737	15.517	0.0487975	36.6982	0.270143	0.914542	5.01272e-05	2.16232	0.00463641
MBH-AGA3	17.4069	0.027658	15.5483	0.0246152	37.2837	0.123897	0.893025	3.95016e-05	2.14192	0.000151917
	17.4118	0.0314557	15.55	0.0278665	37.2936	0.135824	0.893029	3.18125e-05	2.14199	0.000101974
	17.3975	0.0277638	15.5366	0.0244798	37.2879	0.142084	0.892979	4.86758e-05	2.14167	0.000260589
	17.4141	0.0346533	15.5514	0.0303894	37.2935	0.148514	0.892984	3.74204e-05	2.1418	8.94073e-05
	17.4113	0.042165	15.5489	0.0370928	37.2904	0.180669	0.892987	4.03583e-05	2.14182	0.000112009
	17.4207	0.0280161	15.5564	0.0246933	37.3065	0.120371	0.892953	2.94192e-05	2.14165	0.000133652
	17.4213	0.0289519	15.5578	0.0254326	37.312	0.123427	0.892995	2.95807e-05	2.14187	7.59393e-05
	17.4048	0.033599	15.5412	0.0300809	37.2708	0.145916	0.892963	3.25997e-05	2.14175	0.000107475
RMAgD-1	18.7139	0.032751	15.6702	0.026977	38.8254	0.135186	0.837606	4.83644e-05	2.07548	0.00022011
	18.7114	0.0317505	15.6738	0.0262845	38.8359	0.132458	0.837602	2.75204e-05	2.07562	7.45652e-05
	18.7063	0.0284681	15.6731	0.0238442	38.831	0.121906	0.837658	3.41582e-05	2.07582	0.00012604
RMAgS-1	18.066	0.0219107	15.5946	0.0197923	38.1377	0.100104	0.863272	8.1768e-05	2.11143	0.000352216
	18.07	0.0345505	15.5918	0.0294036	38.1247	0.145814	0.863111	3.3357e-05	2.11069	0.00014116
	18.0585	0.0306629	15.5869	0.0257751	38.1144	0.166116	0.8632	3.45565e-05	2.11102	0.000128933
RMAgC-1	18.5087	0.0907566	15.6291	0.0754073	38.4208	0.376688	0.844361	7.84727e-05	2.07603	0.000204143
	18.5175	0.115408	15.6309	0.0960499	38.4286	0.478634	0.84437	8.4863e-05	2.07603	0.000164981
	18.5683	0.110952	15.6787	0.0923383	38.5504	0.460244	0.844452	8.23404e-05	2.0767	0.000167387
RMAgP-1	20.1118	0.0966994	15.8363	0.0750759	41.0289	0.394662	0.787373	7.56362e-05	2.04014	0.000214043
	20.0911	0.1137	15.8148	0.0881438	40.9705	0.463275	0.787344	8.73287e-05	2.04002	0.000237625
	20.1212	0.101288	15.8441	0.0784915	41.0526	0.412984	0.787472	7.11683e-05	2.04061	0.000155359
RMAg12467	18.5324	0.0142873	15.6602	0.0122911	38.6546	0.0627563	0.844974	0.000134357	2.08589	0.000607694
	18.523	0.0165194	15.6525	0.0142168	38.6354	0.0715226	0.844986	0.000112966	2.08591	0.000562222
	18.5036	0.0152366	15.6352	0.0134131	38.5923	0.0698448	0.844938	8.26134e-05	2.08577	0.000491923
	18.5121	0.0232644	15.6423	0.0209581	38.6104	0.108754	0.844932	0.000121114	2.08579	0.000568484
	18.5169	0.0168714	15.6467	0.0146135	38.6221	0.0742746	0.844952	0.0001212	2.08587	0.000589857
	18.5176	0.0145979	15.6474	0.0132924	38.6236	0.0709052	0.844957	0.000111596	2.08588	0.000587324
	18.522	0.0197624	15.6508	0.0182194	38.6322	0.0947097	0.844938	0.000106247	2.08585	0.000441176
	18.5249	0.0155082	15.6535	0.0132369	38.6384	0.0641397	0.844954	6.51324e-05	2.08586	0.000371805
	18.5303	0.0179092	15.6574	0.0162581	38.6471	0.0834935	0.844919	7.85336e-05	2.08572	0.000319647
	18.5386	0.0160431	15.6662	0.0156614	38.6713	0.0881362	0.845012	0.000164095	2.08608	0.000803154
	18.5267	0.0168039	15.6537	0.0155484	38.6341	0.0815175	0.844882	0.000111322	2.08543	0.000478356
	18.5188	0.0136544	15.648	0.0120705	38.6245	0.0623671	0.844937	0.000134803	2.08579	0.000606455
	18.5313	0.0221951	15.655	0.0231281	38.6551	0.0849903	0.844746	0.000258941	2.08604	0.000230934
	18.5358	0.0161969	15.6596	0.0137823	38.6567	0.067606	0.844784	0.000127435	2.08562	9.20285e-05
	18.5276	0.0157851	15.6513	0.0168263	38.6282	0.125222	0.844711	0.000297504	2.08488	0.00189757
	18.5453	0.0129768	15.6728	0.0110329	38.6921	0.0537501	0.845075	2.01384e-05	2.08645	0.000107619
	18.5634	0.0159771	15.6852	0.0136944	38.713	0.0687012	0.844905	4.82939e-05	2.08554	0.000269604
	18.5052	0.0154291	15.6361	0.013035	38.5859	0.065289	0.844913	1.9527e-05	2.08527	0.000205825
	18.5538	0.0284513	15.672	0.0227208	38.6429	0.0943693	0.844634	0.000106501	2.08291	0.00106187
	18.5643	0.0103488	15.6886	0.00873674	38.748	0.0422034	0.844697	9.00276e-05	2.08408	0.000729777
	18.5559	0.0236579	15.6732	0.0192688	38.6583	0.091557	0.844618	4.60203e-05	2.08331	0.000487559
	18.5613	0.0132059	15.6839	0.0110398	38.7218	0.0550703	0.844934	1.87919e-05	2.08624	5.24221e-05
	18.548	0.0263871	15.672	0.0248516	38.6811	0.138176	0.844896	0.000198974	2.08555	0.000986069
	18.5628	0.0137671	15.6815	0.0131468	38.6978	0.08915	0.844733	0.000419592	2.08479	0.00202061
	18.5361	0.0221366	15.6587	0.0175949	38.6411	0.0866233	0.844724	0.000173061	2.08474	0.000810901
	18.5686	0.0167219	15.6907	0.013627	38.7318	0.0677719	0.844969	5.86974e-05	2.08597	0.000255896
	18.545	0.0192065	15.6655	0.0156174	38.6566	0.076369	0.84469	4.30528e-05	2.08456	0.000181412
	18.5408	0.0230252	15.6626	0.0191535	38.652	0.0954813	0.844719	2.93882e-05	2.0848	0.000107448
	18.551	0.0247311	15.6738	0.0206226	38.6857	0.1028	0.844863	3.84195e-05	2.08552	0.000119712
	18.5333	0.0188852	15.6601	0.0156894	38.6536	0.0784707	0.844916	2.69715e-05	2.0857	8.68088e-05

## Sheet: Table S5 Stockholm nsLA
Table S5. Vegacenter Stockholm nsLA-MC-ICPMS analyses
	206Pb/204Pb	2SD	2SE*	207Pb/204Pb	2SD	2SE*	208Pb/204Pb	2SD	2SE*	207Pb/206Pb	2SD	2SE*	208Pb/206Pb	2SD	2SE*
RM981-3	16.9409	0.02264	0.0049021	15.5033	0.022101	0.00416232	36.7553	0.084043	0.0141976	0.915142	0.000519	2.21433e-05	2.16962	0.002019	0.000827969
	16.934	0.021858	0.0047683	15.4979	0.0213	0.00406039	36.7455	0.08142	0.0135655	0.915194	0.000422	1.74019e-05	2.16992	0.001559	0.000656996
	16.9387	0.0119051	0.0033527	15.4827	0.011258	0.00297555	36.6791	0.0616837	0.00962987	0.914045	0.000499873	2.11159e-05	2.1654	0.00195087	0.000800087
	16.9338	0.00862352	0.00298511	15.491	0.00779589	0.00267315	36.7186	0.0587975	0.00915922	0.914795	0.000527321	2.26058e-05	2.16836	0.0020891	0.000857671
	16.9445	0.0132609	0.00351749	15.4917	0.0188168	0.00375997	36.7022	0.0933642	0.0166916	0.914258	0.000604138	2.73585e-05	2.16602	0.00284733	0.00125574
	16.9373	0.0148813	0.00372509	15.4808	0.0212301	0.00405161	36.6679	0.0989737	0.018399	0.914011	0.00065491	3.10361e-05	2.16492	0.00311562	0.00143709
RMAgD-1	18.7115	0.026	0.00552106	15.6921	0.025	0.00455312	38.9132	0.088	0.0152072	0.838635	0.00038	1.56778e-05	2.07964	0.00153	0.000647486
	18.7025	0.026	0.00552106	15.6773	0.025	0.00455312	38.861	0.089	0.0154736	0.838245	0.00036	1.49179e-05	2.07785	0.00145	0.000621957
	18.7155	0.027	0.00571995	15.6917	0.026	0.00469626	38.9118	0.093	0.0165864	0.838435	0.00039	1.60722e-05	2.07912	0.00159	0.000667317
	18.6935	0.015	0.00374077	15.6557	0.014	0.00323914	38.7917	0.063	0.00985249	0.837495	0.00043	1.77512e-05	2.07514	0.00178	0.000734215
	18.6935	0.012	0.00336398	15.66	0.011	0.00295188	38.804	0.063	0.00985249	0.837725	0.00043	1.77512e-05	2.0758	0.00172	0.000712395
	18.6835	0.012	0.00336398	15.6503	0.011	0.00295188	38.779	0.062	0.00968291	0.837655	0.00044	1.81977e-05	2.07557	0.00179	0.000737916
	18.7045	0.022	0.00479232	15.6619	0.027	0.00484391	38.8005	0.115	0.0243016	0.837335	0.00068	3.3032e-05	2.07439	0.00333	0.00160066
	18.7065	0.025	0.0053291	15.6672	0.03	0.00531529	38.8228	0.123	0.0279227	0.837525	0.0008	4.45036e-05	2.07536	0.00374	0.00196712
	18.6995	0.029	0.00613947	15.6602	0.034	0.0060159	38.8008	0.129	0.0309883	0.837465	0.00083	4.79468e-05	2.07496	0.0039	0.00213192
RMAgN-2	18.508	0.024	0.0051438	15.6301	0.023	0.00427978	38.6257	0.085	0.0144354	0.844508	0.00034	1.41949e-05	2.08698	0.00135	0.000591457
	18.508	0.025	0.0053291	15.6209	0.024	0.00441433	38.7362	0.199	0.104474	0.844008	0.00038	1.56778e-05	2.09295	0.00993	0.00605923	Outlier, rejected
	18.506	0.024	0.0051438	15.6397	0.023	0.00427978	38.6676	0.085	0.0144354	0.845118	0.00036	1.49179e-05	2.08947	0.00145	0.000621957
	18.502	0.009	0.00302514	15.6319	0.008	0.0026901	38.6404	0.061	0.00951624	0.844878	0.00047	1.96056e-05	2.08845	0.00192	0.000787762
	18.51	0.009	0.00302514	15.63	0.008	0.0026901	38.6214	0.061	0.00951624	0.844408	0.00048	2.00987e-05	2.08652	0.00198	0.00081189
	18.505	0.009	0.00302514	15.6335	0.008	0.0026901	38.6428	0.061	0.00951624	0.844828	0.00047	1.96056e-05	2.08824	0.00191	0.000783811
	18.509	0.014	0.0036107	15.6317	0.019	0.00378135	38.625	0.1	0.0187298	0.844548	0.00059	2.64144e-05	2.08683	0.00301	0.00136276
	18.512	0.017	0.00401513	15.6294	0.023	0.00427978	38.6172	0.106	0.0207861	0.844288	0.00065	3.06599e-05	2.08607	0.00312	0.00144026
	18.503	0.021	0.00462569	15.6372	0.027	0.00484391	38.658	0.118	0.025601	0.845118	0.00082	4.67704e-05	2.08929	0.00375	0.00197704
RMAg3834	18.4746	0.027	0.00571995	15.6815	0.025	0.00455312	38.6185	0.088	0.0152072	0.848813	0.00042	1.73157e-05	2.09036	0.00167	0.000694708
	18.506	0.025	0.0053291	15.7555	0.024	0.00441433	38.8896	0.089	0.0152072	0.851376	0.0005	2.11159e-05	2.10146	0.00208	0.000857671	Outlier, rejected
	18.4786	0.025	0.0053291	15.6837	0.024	0.00441433	38.6324	0.087	0.0149455	0.848753	0.00037	1.52932e-05	2.09066	0.00154	0.000650749
	18.4502	0.0114134	0.00329487	15.634	0.0103985	0.00289742	38.4699	0.0619249	0.0096703	0.847359	0.000429322	1.77213e-05	2.08507	0.00172715	0.000714962
	18.4592	0.0528419	0.0142745	15.6672	0.0523258	0.0106088	38.508	0.12227	0.0275712	0.848748	0.00162836	0.000348386	2.08612	0.00495083	0.00361613
	18.4559	0.0116014	0.00331686	15.6423	0.0106252	0.00291783	38.5017	0.0635242	0.00994257	0.84755	0.000537517	2.31857e-05	2.08615	0.00219846	0.000906155
	18.4438	0.0190916	0.0043236	15.6314	0.0241969	0.00444132	38.4661	0.108146	0.0215754	0.847513	0.00066819	3.20771e-05	2.08559	0.00318273	0.00148642
	18.4644	0.0277687	0.00587768	15.6427	0.033136	0.00585714	38.4895	0.124886	0.0288521	0.847177	0.000912995	5.89248e-05	2.08452	0.00415376	0.00242207
	18.4529	0.0217647	0.00475258	15.6418	0.0269975	0.00484353	38.498	0.114965	0.0242867	0.847661	0.000786134	4.29967e-05	2.08629	0.00359762	0.00183122
RMAg12467	18.5526	0.024	0.0051438	15.6957	0.023	0.00427978	38.7853	0.088	0.0152072	0.846013	0.0004	1.64764e-05	2.09057	0.0016	0.000670681
	18.5645	0.024	0.0051438	15.7159	0.023	0.00427978	38.8455	0.089	0.0154736	0.846553	0.00043	1.77512e-05	2.09246	0.00175	0.000723222
	18.5725	0.025	0.0053291	15.7282	0.024	0.00441433	38.8869	0.089	0.0154736	0.846853	0.00042	1.73157e-05	2.09379	0.00175	0.000723222
	18.5364	0.00910473	0.00303638	15.6609	0.00780245	0.0026737	38.6573	0.0603964	0.00941703	0.844871	0.000428331	1.76777e-05	2.08548	0.00172646	0.000714713
	18.5349	0.00936188	0.00306413	15.6598	0.00810893	0.00269918	38.6549	0.0606974	0.00946637	0.844885	0.000434361	1.79445e-05	2.08552	0.00178583	0.000736369
	18.5337	0.00924326	0.0030513	15.6576	0.00797576	0.00268808	38.6473	0.0604315	0.00942278	0.844815	0.000428537	1.76868e-05	2.08524	0.00178581	0.000736362
	18.5385	0.0183341	0.00420924	15.6616	0.0237092	0.00437477	38.6532	0.108557	0.0217297	0.844816	0.000675589	3.26721e-05	2.08502	0.0031992	0.00149877
	18.5385	0.0243778	0.00521305	15.6596	0.031044	0.00548987	38.6494	0.128395	0.0306647	0.844706	0.00088332	5.47373e-05	2.08482	0.00407741	0.00233084
	18.5423	0.0247271	0.00527787	15.6699	0.0313328	0.00553917	38.6868	0.127393	0.0301356	0.845086	0.00082705	4.75968e-05	2.08641	0.00391565	0.00214876
*Standard error (2SE) was not provided but could be back calculated using logarithmic equations relating the measurement of standard deviation and the standard error of 24 primary standard measurements.

## Sheet: Table S6 U. of Edinburgh nsLA
Table S6. U. of Edinburgh nsLA-MC-ICPMS analyses
	206Pb/204Pb	2SE	207Pb/204Pb	2SE	208Pb/204Pb	2SE	207Pb/206Pb	2SE	208Pb/206Pb	2SE
RM981-3	16.9755	0.0168	15.5207	0.0147	36.7636	0.0362	0.914362	6.71e-05	2.16583	0.00017
	16.9557	0.0148	15.4861	0.0124	36.7015	0.031	0.914181	0.000111	2.16507	0.000244
	17.007	0.0108	15.5536	0.00951	36.8411	0.0241	0.914587	8.08e-05	2.16646	0.000147
MBH-AGA3	17.4195	0.00761	15.5518	0.00666	37.2787	0.0163	0.892857	4.95e-05	2.14053	0.000121
	17.3989	0.00858	15.5333	0.00745	37.2314	0.0189	0.89288	7.26e-05	2.14024	8.21e-05
	17.4183	0.00637	15.5499	0.00601	37.2585	0.0142	0.892859	7.31e-05	2.13944	9.74e-05
RMAgD-1	18.7051	0.00809	15.6693	0.0062	38.8047	0.0161	0.837799	7.59e-05	2.07473	0.000135
	18.703	0.0166	15.6722	0.0137	38.8024	0.0355	0.837952	6.42e-05	2.07484	0.000117
	18.7035	0.00989	15.6681	0.00793	38.7966	0.0204	0.837782	7.28e-05	2.0745	0.00014
RMAgN-2	18.5122	0.00757	15.6446	0.00511	38.6319	0.0169	0.844979	6.57e-05	2.08705	8.62e-05
	18.5251	0.00552	15.6495	0.00406	38.6618	0.0122	0.84486	5.21e-05	2.08715	6.34e-05
	18.4955	0.00821	15.6295	0.00585	38.5949	0.018	0.845103	7.32e-05	2.08692	5.68e-05
	18.4988	0.00859	15.6278	0.00734	38.6039	0.0185	0.844839	3.45e-05	2.08704	7.88e-05
	18.5128	0.0118	15.6398	0.00911	38.6313	0.0255	0.844879	7e-05	2.08703	7.35e-05
	18.5116	0.00705	15.6388	0.00539	38.6288	0.0153	0.844899	5.16e-05	2.08701	6.39e-05
	18.4944	0.00471	15.6272	0.00365	38.5993	0.0102	0.845001	3.89e-05	2.08724	8.06e-05
	18.5133	0.0109	15.6459	0.00838	38.6338	0.0219	0.845189	5.02e-05	2.08754	8.49e-05
	18.5192	0.00612	15.6481	0.00459	38.6473	0.014	0.845036	5.17e-05	2.08698	9.13e-05
	18.5195	0.00833	15.6485	0.00618	38.6391	0.0182	0.845044	7.9e-05	2.08675	0.000103
	18.5024	0.00535	15.637	0.00438	38.6099	0.0107	0.844945	3.9e-05	2.08678	6.16e-05
	18.5112	0.00516	15.6376	0.00388	38.6178	0.0107	0.844804	4.52e-05	2.0866	7.56e-05
	18.495	0.0108	15.6237	0.00838	38.6023	0.0261	0.845005	0.000103	2.08733	8.88e-05
	18.4812	0.00627	15.6189	0.00453	38.5756	0.0139	0.845062	5.44e-05	2.0875	7.06e-05
	18.5037	0.00661	15.6363	0.00498	38.6038	0.0153	0.845097	6.09e-05	2.08686	6.35e-05
RMAgS-1	18.0438	0.0079	15.5768	0.00572	38.0622	0.0176	0.86335	8.65e-05	2.10975	0.000113
	18.0779	0.00746	15.6026	0.00518	38.1452	0.0162	0.863253	5.91e-05	2.1102	8.5e-05
	18.0682	0.00926	15.596	0.0069	38.1188	0.0204	0.863234	8.54e-05	2.11002	0.000111
	18.0443	0.00746	15.5756	0.00601	38.0825	0.0164	0.863317	6.2e-05	2.11059	9.45e-05
	18.052	0.00857	15.5851	0.0065	38.0916	0.0179	0.863345	7.02e-05	2.11021	6.96e-05
	18.0382	0.0068	15.5734	0.00516	38.0602	0.0152	0.863346	5.33e-05	2.11015	6.93e-05
	18.055	0.00782	15.5846	0.00587	38.0981	0.0173	0.863214	7.13e-05	2.11023	6.77e-05
	18.0323	0.00683	15.564	0.00529	38.0345	0.0148	0.863164	5.62e-05	2.10946	8.36e-05
	18.0603	0.0052	15.5928	0.00417	38.1084	0.0118	0.863401	3.84e-05	2.11033	7.45e-05
	18.0553	0.00451	15.5875	0.00361	38.0965	0.0097	0.86339	3.75e-05	2.11022	6.43e-05
	18.0392	0.00791	15.5738	0.00612	38.06	0.0184	0.863396	7.67e-05	2.10986	5.99e-05
	18.0377	0.00907	15.5607	0.00594	38.0258	0.0196	0.862908	9.89e-05	2.10885	7.55e-05
	18.0503	0.0104	15.5806	0.00765	38.0821	0.0232	0.863172	8.51e-05	2.11001	9.19e-05
RMAg12467	18.5957	0.0123	15.7138	0.00881	38.7629	0.0263	0.845378	8.99e-05	2.0847	0.000153
	18.6292	0.0128	15.7429	0.0108	38.8327	0.0253	0.844918	7.7e-05	2.08422	0.000146
	18.6392	0.0116	15.7443	0.00984	38.8418	0.0242	0.844692	6.23e-05	2.08406	0.000114
	18.4567	0.00991	15.6583	0.00869	38.568	0.0227	0.848276	0.000112	2.08972	0.000228	Outlier, rejected
	18.5094	0.0125	15.6465	0.0106	38.5893	0.0283	0.845309	0.000114	2.08489	0.000165
	18.5193	0.0116	15.6625	0.00883	38.6161	0.0263	0.845789	0.000121	2.08529	0.00018
	18.4424	0.0111	15.6348	0.00958	38.5079	0.0257	0.84743	0.000112	2.0878	0.000245
	18.4884	0.0112	15.6282	0.00909	38.551	0.0233	0.845313	7.03e-05	2.08529	0.00014
	18.5137	0.0117	15.6416	0.0103	38.5791	0.0271	0.845138	6.17e-05	2.08462	0.000101
	18.5225	0.00899	15.6488	0.00691	38.6263	0.0145	0.84504	7.56e-05	2.08481	7.86e-05
	18.5206	0.00863	15.6505	0.00714	38.5987	0.0188	0.845093	5.32e-05	2.08431	9.95e-05
	18.5189	0.00934	15.6516	0.00729	38.6083	0.0203	0.84521	7.48e-05	2.08488	7.87e-05

## Sheet: Table S7 Frankfurt MC-ICPMS
Table S7. Goethe-U. Frankfurt/Main MC-ICPMS bulk analyses.
	206Pb/204Pb	2SE	207Pb/204Pb	2SE	208Pb/204Pb	2SE	207Pb/206Pb	2SE	208Pb/206Pb	2SE
RMAg3834	18.4521	0.000927923	15.6388	0.00101825	38.4813	0.00343258	0.847487	1.90315e-05	2.08546	9.15833e-05
RMAg12467	18.5332	0.00141547	15.6597	0.00127029	38.6506	0.00341676	0.844887	2.2232e-05	2.0854	7.4362e-05

## Sheet: Table S8 Hanover fsLA-MC-ICPMS
Table S8. Leibniz-U. Hanover fsLA-MC-ICPMS analyses.
	206Pb/204Pb	2SE	207Pb/204Pb	2SE	208Pb/204Pb	2SE	207Pb/206Pb	2SE	208Pb/206Pb	2SE
RMAg3834	18.4571	0.00310462	15.6429	0.00290317	38.493	0.00696665	0.847514	7.08632e-05	2.08556	0.00019727
RMAg12467	18.5352	0.000756322	15.6618	0.000688904	38.6594	0.00187524	0.844927	2.07862e-05	2.08567	5.99896e-05

## Sheet: Table S9 Ag matrix test
Table S9. Ag matrix tests. Tests on spiked NBS981 with different amounts of Ag.
sample	206Pb/204Pb	2SE	207Pb/204Pb	2SE	208Pb/204Pb	2SE	207Pb/206Pb	2SE	208Pb/206Pb	2SE
NBS981	16.9417		15.4996		36.725		0.91488		2.1677
Thirwall 2002	0.0029		0.0031		0.009		8e-05		0.0002
Ag/Pb ratios
0	16.9413	0.000812475	15.4994	0.000726869	36.7244	0.00172623	0.91489	6.54082e-06	2.16771	2.15308e-05
0	16.9415	0.000824878	15.4997	0.000739308	36.7255	0.00175204	0.914896	6.40235e-06	2.16775	1.84505e-05
0	16.9418	0.000853422	15.4998	0.000774657	36.7257	0.00184712	0.914886	5.95308e-06	2.16773	1.76891e-05
1	16.9402	0.000825189	15.4974	0.000741696	36.7177	0.00175066	0.914833	5.74478e-06	2.16746	1.9673e-05
1	16.9427	0.000813389	15.501	0.000722164	36.7288	0.00173939	0.91491	6.1998e-06	2.1678	2.16838e-05
1	16.9433	0.000832236	15.5018	0.000744512	36.7317	0.0017882	0.914923	6.2555e-06	2.16789	2.01122e-05
10	16.942	0.000774699	15.5	0.000709089	36.726	0.00174627	0.914888	7.63194e-06	2.16772	3.06679e-05
10	16.9423	0.000681098	15.5004	0.000628086	36.7274	0.00157886	0.914891	7.63182e-06	2.16776	3.04705e-05
10	16.9416	0.000704676	15.4996	0.000621339	36.7251	0.00149893	0.914881	6.27916e-06	2.16771	1.9839e-05
20	16.9435	0.000754225	15.502	0.000671187	36.7324	0.00161003	0.914927	5.81326e-06	2.16791	1.94976e-05
20	16.9434	0.000724258	15.5019	0.000644995	36.7322	0.00154624	0.914925	6.281e-06	2.1679	2.13858e-05
20	16.9409	0.000765954	15.4985	0.000685914	36.7215	0.00163651	0.914859	6.60256e-06	2.16759	2.36379e-05
30	16.944	0.000874942	15.5027	0.00077451	36.7351	0.00185387	0.914939	6.08521e-06	2.168	2.12709e-05
30	16.944	0.000812416	15.5026	0.000712386	36.7341	0.00169713	0.914933	5.94808e-06	2.16795	1.95194e-05
30	16.9388	0.000839601	15.4957	0.000752943	36.7127	0.00182129	0.914802	7.67823e-06	2.16734	2.90077e-05
50	16.9475	0.000834138	15.507	0.000732988	36.7476	0.00174385	0.914999	7.23792e-06	2.16829	2.63869e-05
50	16.9457	0.000725059	15.5046	0.000639985	36.7405	0.00154658	0.914959	6.4548e-06	2.1681	2.61936e-05
50	16.9472	0.000782344	15.5068	0.000689315	36.7474	0.00164088	0.915003	6.37111e-06	2.16831	2.37895e-05
