# Supplementary material for: “Non-invasive” portable laser ablation sampling for lead isotope analysis of archaeological silver: a comparison with bulk and in situ laser ablation techniques
Source: Royal Society of Chemistry journal article supplement (doi:10.1039/d1ja00342a), 2021-12-01
Supplement: d1ja00342a2.pdf [file d1ja00342a2.pdf]

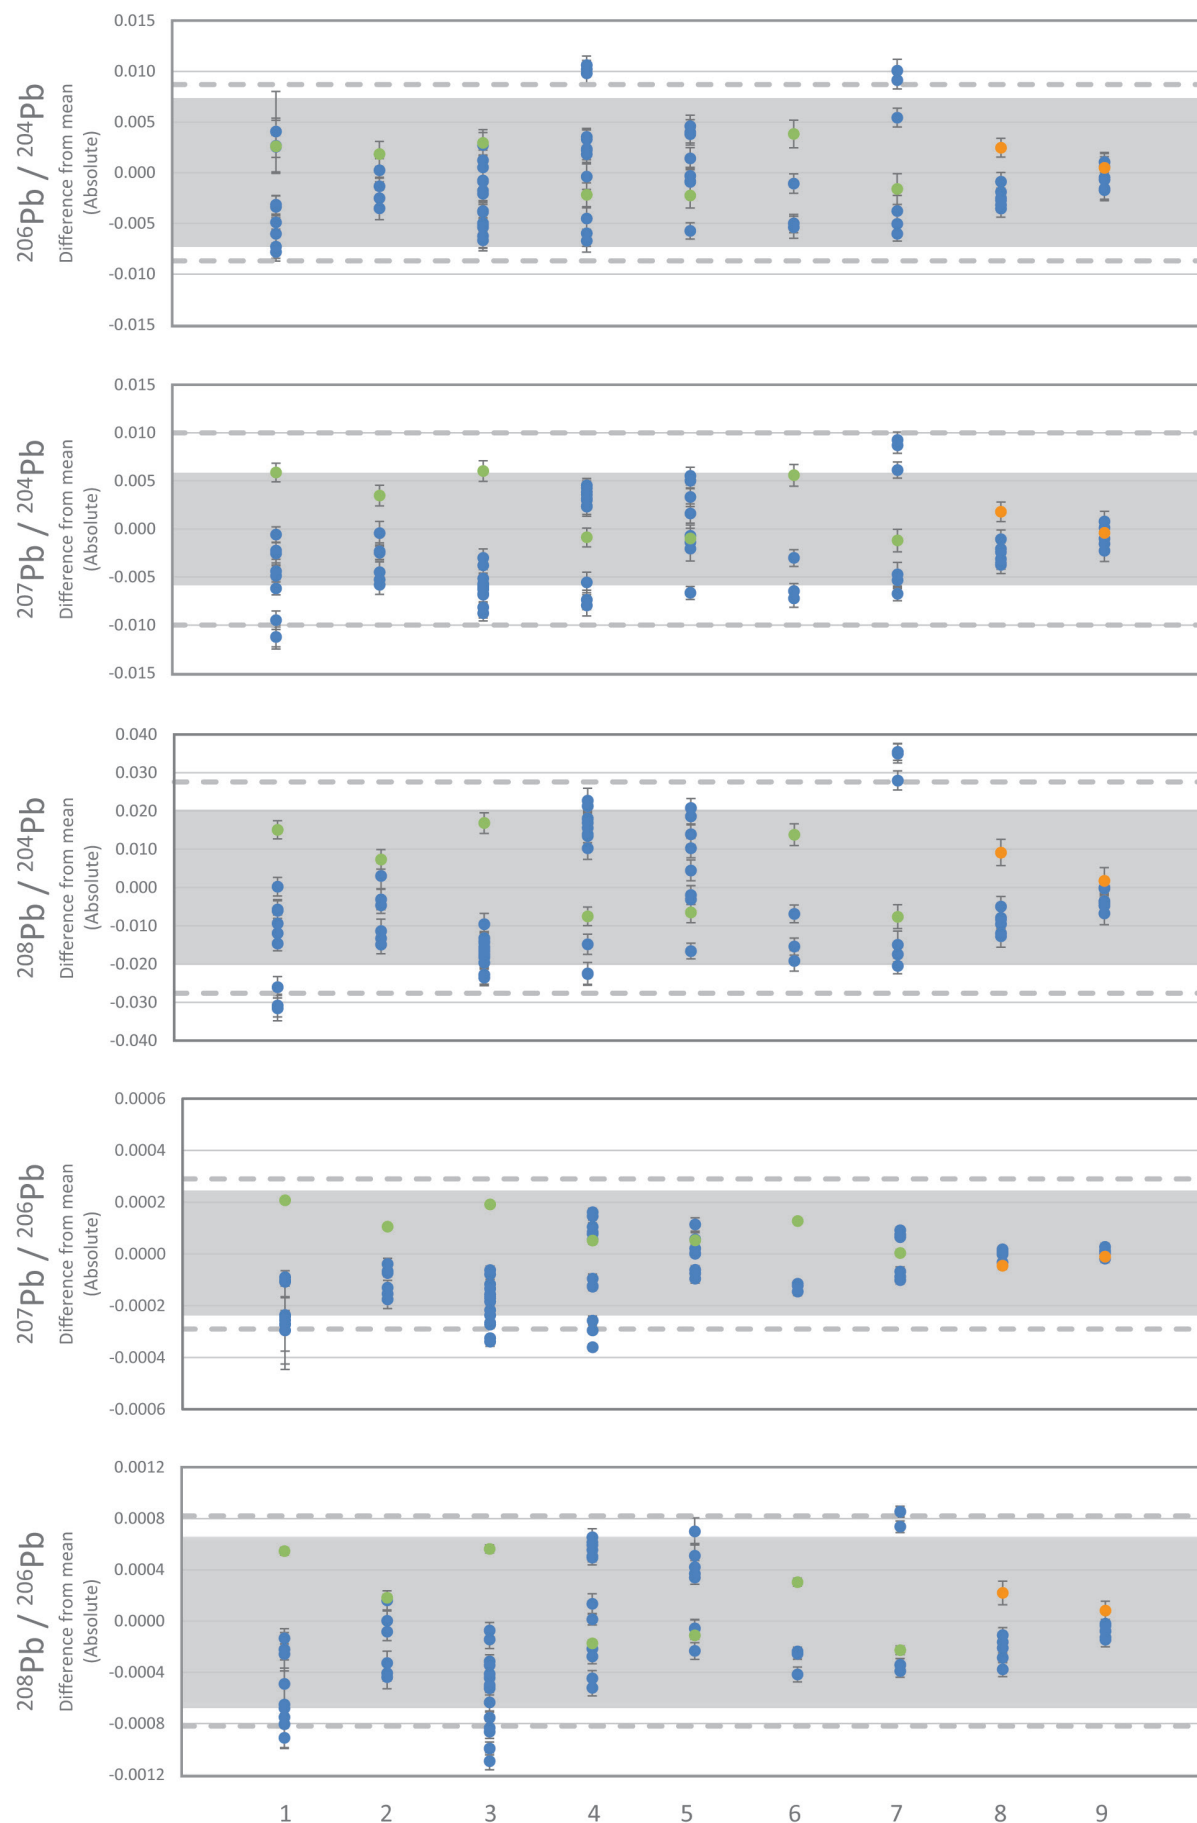

Figure S1. Deviation of single bulk analyses of reference materials from inter-laboratory means. Error bars represent 2SE uncertainties of single bulk analyses. Propagated 2SD uncertainties of the inter-laboratory mean values are based on the long-term precision of standard solutions (grey; see text) and the maximum variation (2SD) of bulk analyses (dashed line). Ox=Blue, VU=Green, GU F/M=Orange.

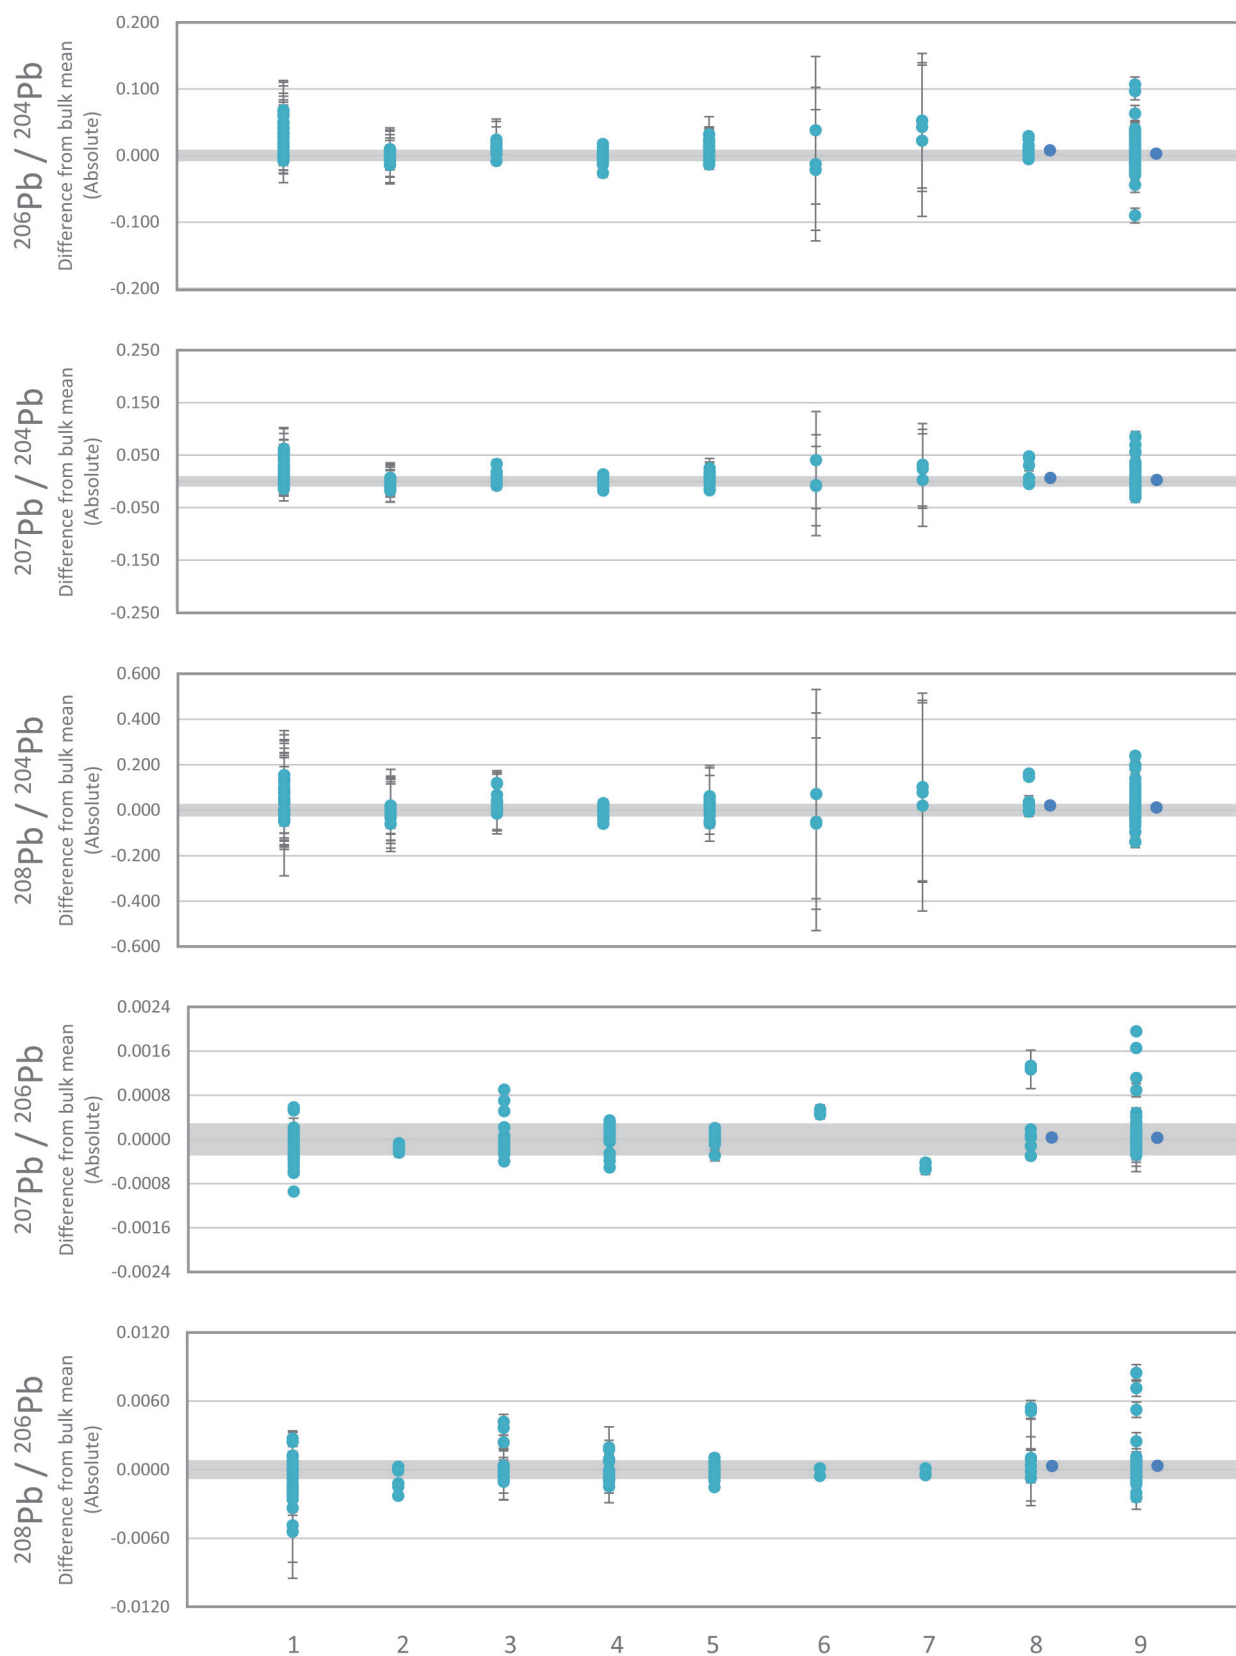

Figure S2. Deviation of single in situ LA-MC-ICPMS analyses from inter-laboratory means. Error bars represent 2SE of single analyses. Propagated 2SD uncertainties of the inter-laboratory mean values are based on the long-term precision of standard solutions (grey; see text). nsLA=Turquoise, fsLA=Blue.

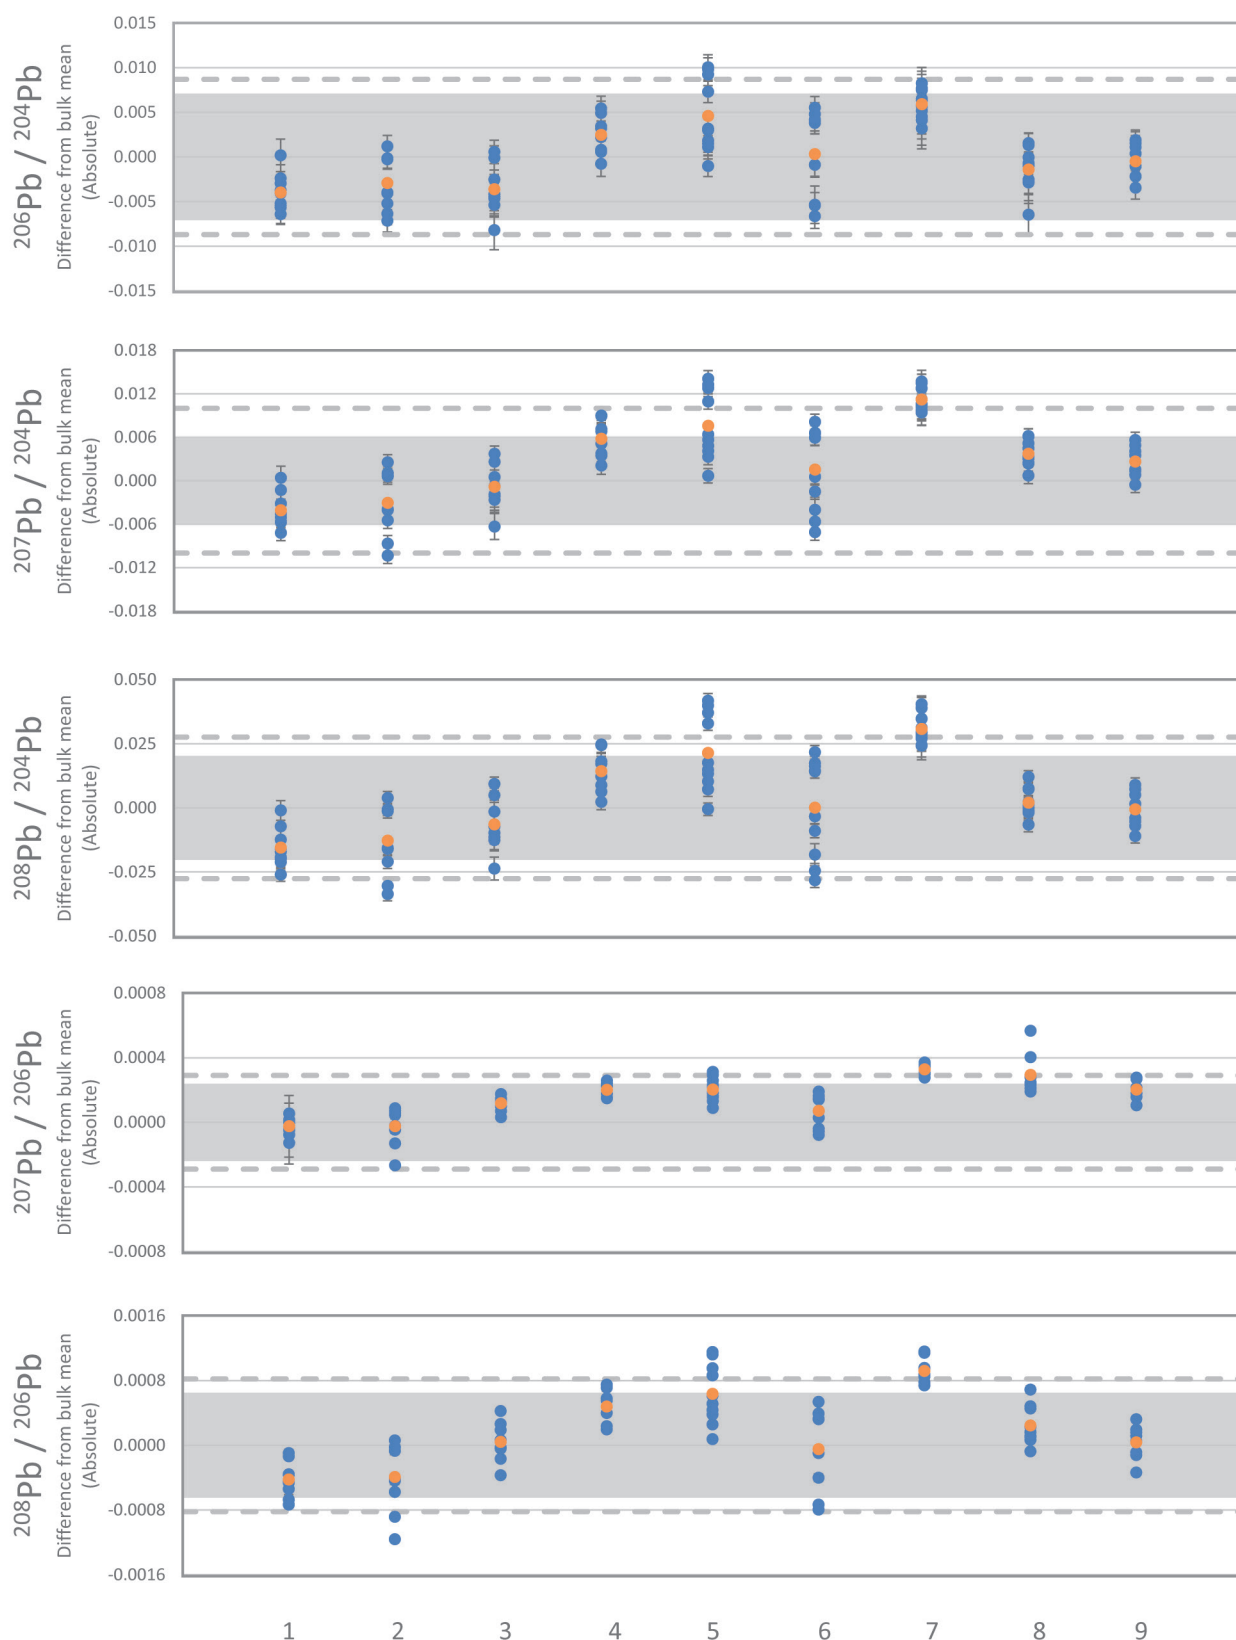

Figure S3. Deviation of pLA filter analyses compared to inter-laboratory means. Error bars on data symbols represent 2SE uncertainties of single analyses. Uncertainties of the inter-laboratory mean values are given as propagated 2SD based on the long-term precision of standard solutions (grey; see text), and maximum variation (2SD) of bulk analyses of the reference materials (dashed line). Filters=Blue, Filter Mean=Orange.

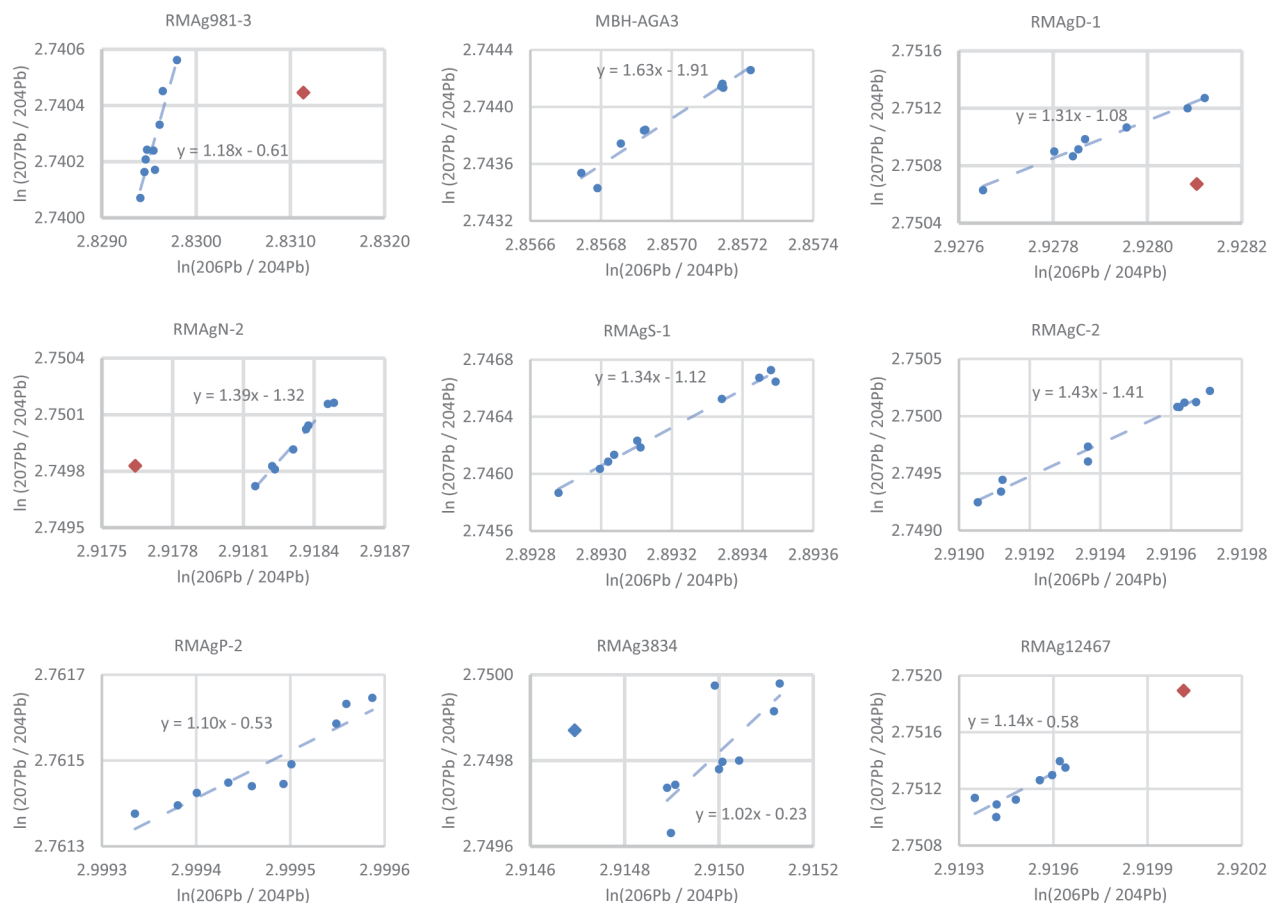

Figure S4. Logarithmic representations of lead isotope ratios of individual pLA filters. Nearly all analyses fall on arrays consistent with mass-dependent fractionation. Red diamond = statistical outlier.
